# Supplementary material for: Linking the timing of a mother’s and child’s death: Comparative evidence from two rural South African population-based surveillance studies, 2000–2015
Source: PLOS journal article supplement (doi:10.1371/journal.pone.0246671), 2021-02-08

**S1 Figure. Marginal mean relative mortality risk ratios (2000-2015), by months before/after mother's death and time period.** Referent marked by dotted line for children whose mother survives or will die 12+ months in the future. Scale of the horizontal axis varies between each time period.

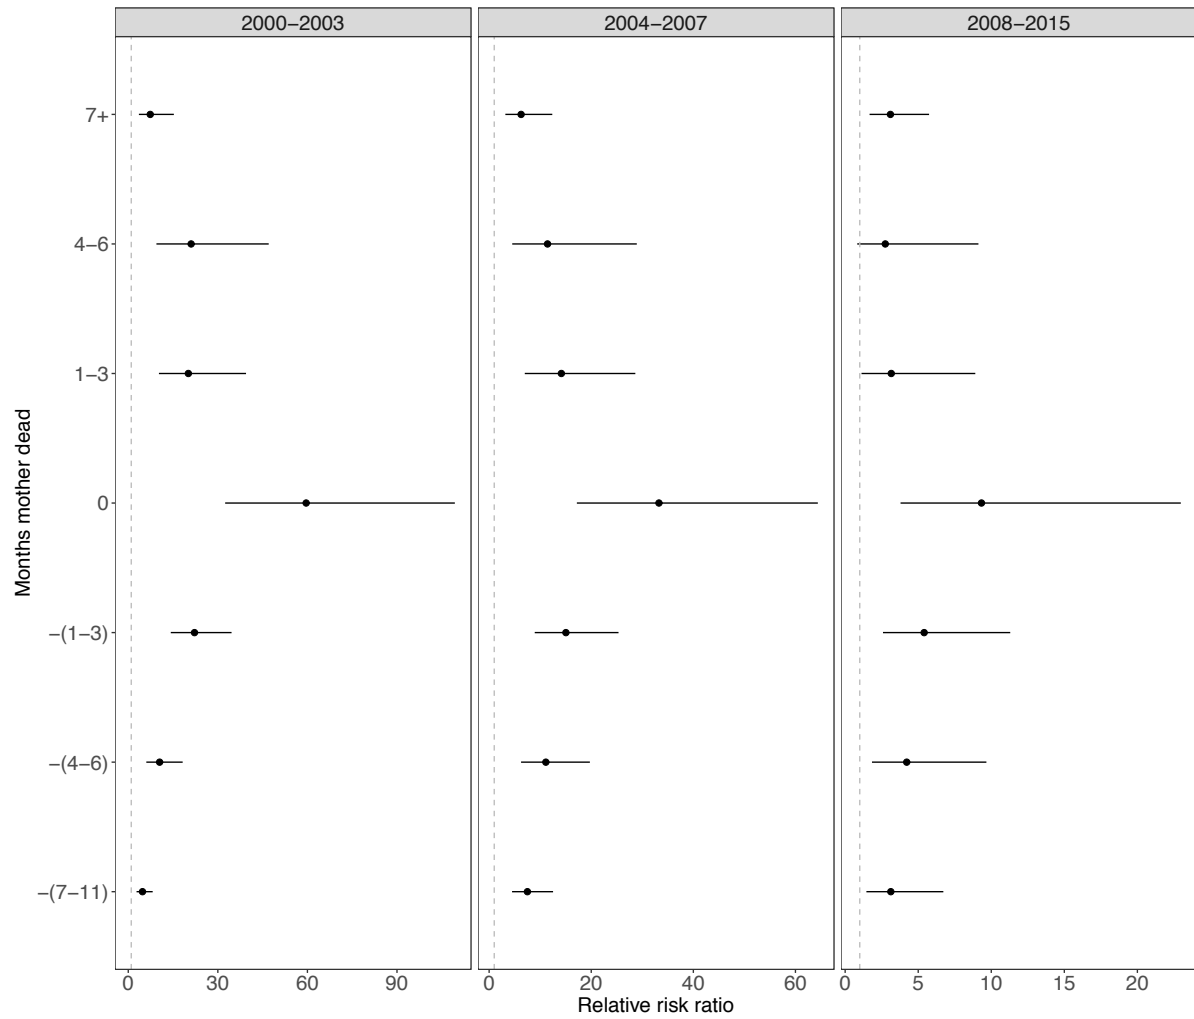

Supplement: S1 (10.1371/journal.pone.0246671.s001) [file journal.pone.0246671.s001]
